# Supplementary material for: Investigation of a gold quantum dot/plasmonic gold nanoparticle system for improvement of organic solar cells
Source: Royal Society of Chemistry journal article supplement (doi:10.1039/c8na00119g), 2018-11-08
Supplement: c8na00119g1.pdf [file c8na00119g1.pdf]

## Electronic Supplementary Information

# Investigation of Gold Quantum Dot/Plasmonic Gold Nanoparticle System for Improvement of Organic Solar Cells

Sopit Phetsang,<sup>ab</sup> Apichat Phengdaam,<sup>c</sup> Chutiparn Lertvachirapaiboon,<sup>a</sup>

Ryousuke Ishikawa,<sup>a</sup> Kazunari Shinbo,<sup>a</sup> Keizo Kato,<sup>a</sup> Pitchaya

Mungkornasawakul,<sup>bd</sup> Kontad Ounnunkad<sup>\*be</sup> and Akira Baba<sup>\*a</sup>

<sup>a</sup>Graduate School of Science and Technology, Niigata University, 8050 Ikarashi-2-nocho,  
Nishi-ku, Niigata 950-2181, Japan.

E-mail: [ababa@eng.niigata-u.ac.jp](mailto:ababa@eng.niigata-u.ac.jp)

<sup>b</sup>Department of Chemistry and Center of Excellence for Innovation in Chemistry (PERCH-  
CIC), Faculty of Science, Chiang Mai University, Chiang Mai 50200, Thailand.

E-mail: [kontad.ounnunkad@cmu.ac.th](mailto:kontad.ounnunkad@cmu.ac.th)

<sup>c</sup>Department of Chemistry, Faculty of Science, Prince of Songkla University, Hat Yai,  
Songkla, 90110, Thailand.

<sup>d</sup>Environmental Science Program, Faculty of Science, Chiang Mai University, Chiang Mai  
50200, Thailand.

<sup>e</sup>Center of Excellence in Materials Science and Technology, Chiang Mai University, Chiang  
Mai 50200, Thailand

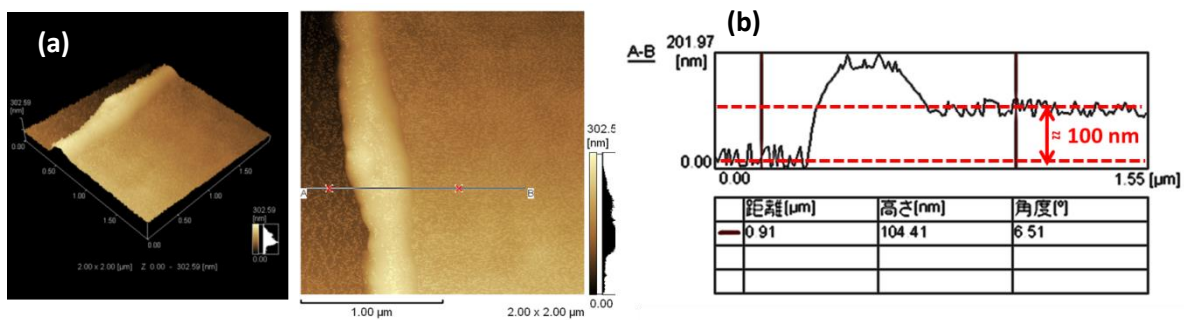

**Figure S1** (a) AFM image and (b) cross-sectional profile of a AuQD/PEDOT:PSS film on a substrate, indicating the thickness of the film (100 nm).

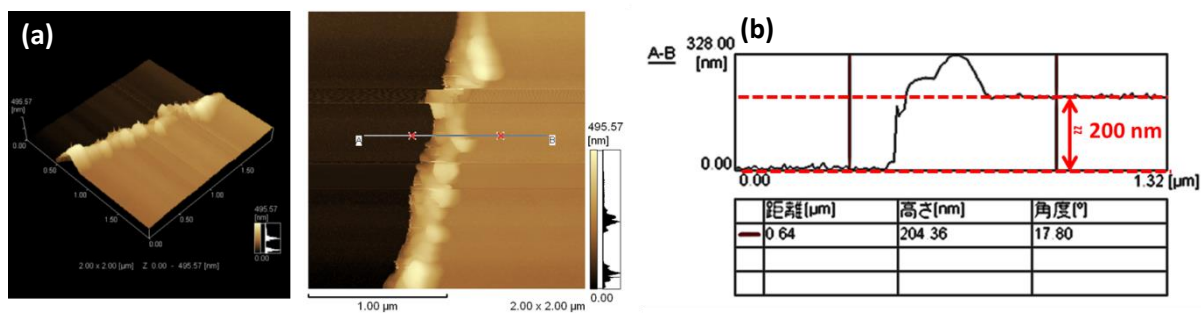

**Figure S2** (a) AFM image and (b) cross-sectional profile of a AuQD/PEDOT:PSS/P3HT:PCBM film on a substrate, indicating the thickness of the film (200 nm).

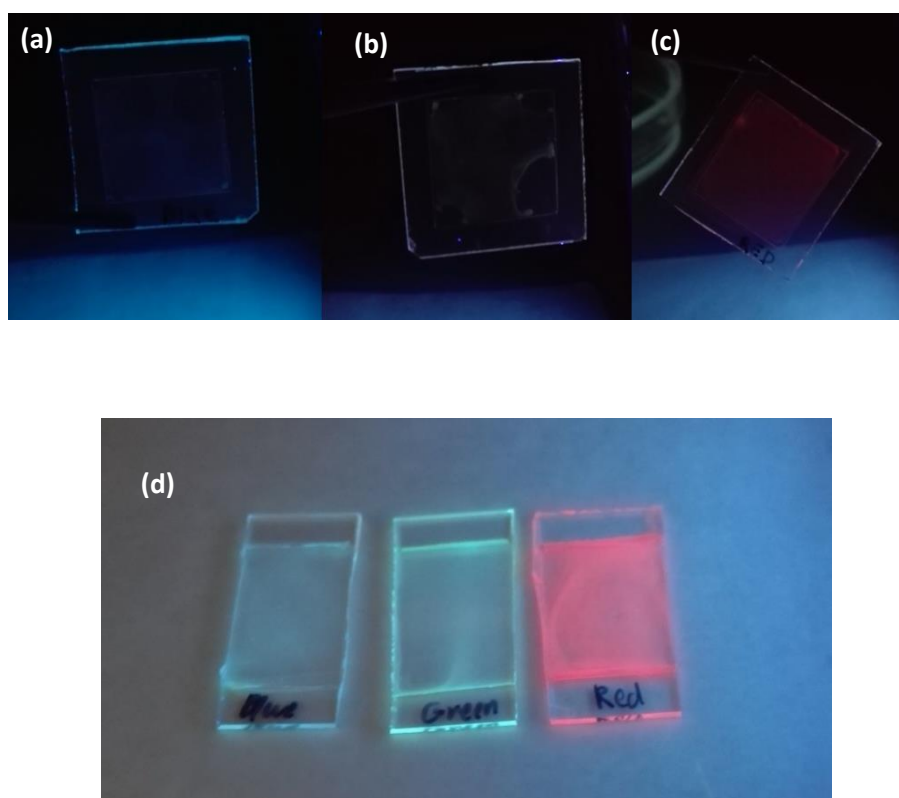

**Figure S3** Fluorescence emission characteristics of AuQD films on glass substrates under UV illumination. (a) B-AuQD film, (b) G-AuQD film, and (c) R-AuQD film deposited by spin-coating method, (d) drop-casted 3 types of AuQD films.

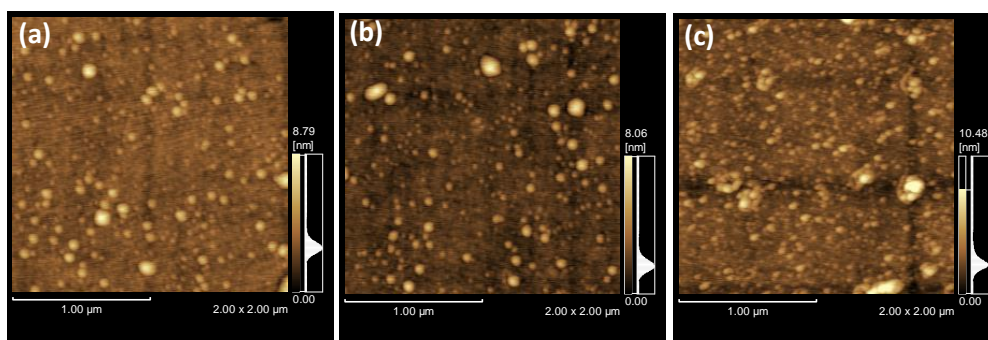

**Figure S4** AFM images of AuQD films after direct spin-coating on glass substrates, (a) B-AuQDs, (b) G-AuQDs, and (c) R-AuQDs at a concentration of 0.0050 mM

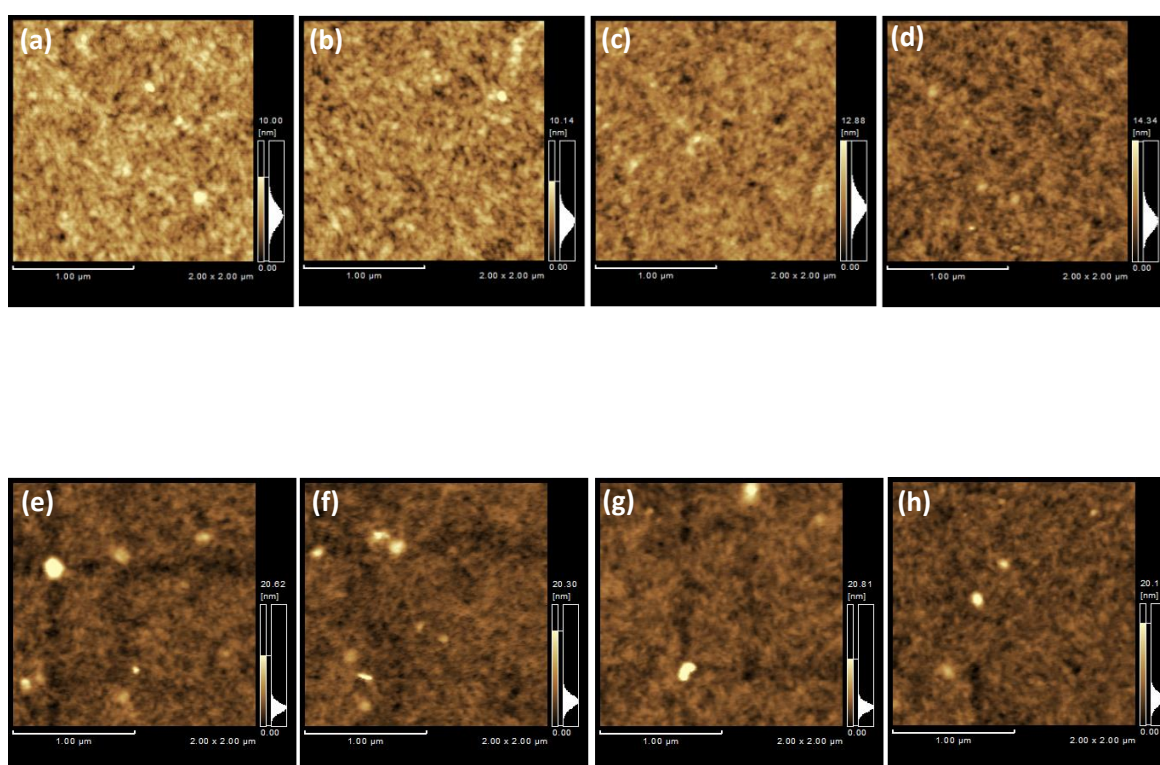

**Figure S5** Surface morphology of PEDOT:PSS films on (a) ITO substrate (reference cell), (b) B-AuQD layer, (c) G-AuQD layer, (d) R-AuQD layer, and of PEDOT:PSS:AuNP films on (e) ITO substrate, (f) B-AuQD layer, (g) G-AuQD layer, and (h) R-AuQD layer.

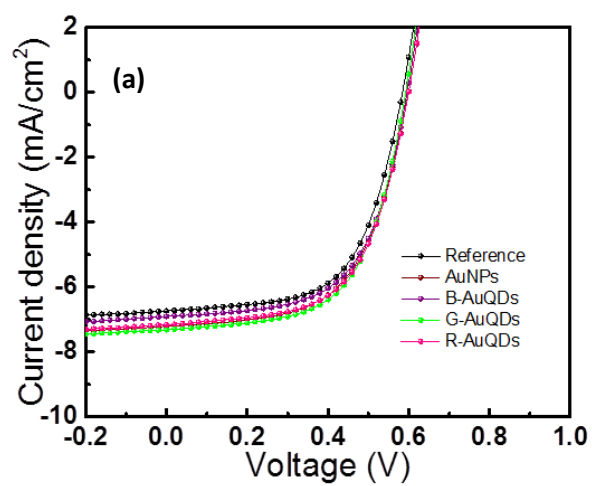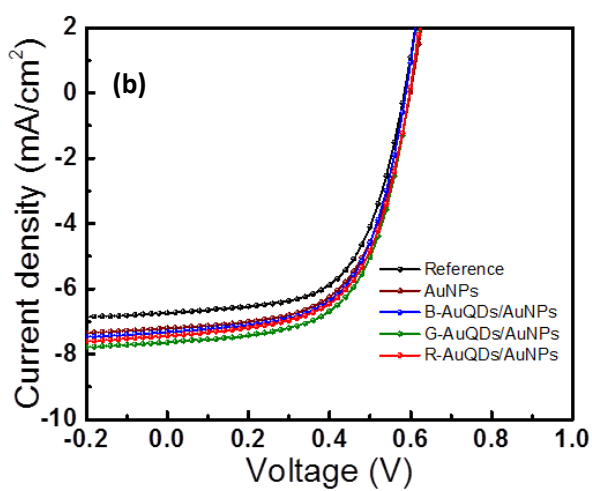

**Figure S6** (a) *J-V* characteristics of the AuQD-loaded OSCs (b) *J-V* characteristics of the AuQD/plasmonic AuNP OSCs compared with those of the reference cell.

**Table S1** Optimization of AuQD contents in the developed OSCs

| Devices              | $J_{sc}$<br>(mA/cm <sup>2</sup> ) | $V_{oc}$<br>(V) | FF<br>(%) | PCE<br>(%) |
|----------------------|-----------------------------------|-----------------|-----------|------------|
| Reference            | 6.85                              | 0.59            | 0.59      | 3.24       |
| AuNPs 0.1 mM         | 7.28                              | 0.59            | 0.60      | 3.42       |
| <b>B-AuQDs/AuNPs</b> |                                   |                 |           |            |
| 0.0100 mM            | 6.83                              | 0.58            | 0.61      | 3.28       |
| 0.0050 mM            | 7.20                              | 0.59            | 0.60      | 3.44       |
| 0.0025 mM            | 7.11                              | 0.59            | 0.62      | 3.43       |
| 0.0012 mM            | 7.08                              | 0.59            | 0.61      | 3.43       |
| <b>G-AuQDs/AuNPs</b> |                                   |                 |           |            |
| 0.0100 mM            | 7.00                              | 0.58            | 0.60      | 3.37       |
| 0.0050 mM            | 7.61                              | 0.60            | 0.60      | 3.66       |
| 0.0025 mM            | 7.48                              | 0.59            | 0.61      | 3.59       |
| 0.0012 mM            | 7.11                              | 0.59            | 0.61      | 3.45       |
| <b>R-AuQDs/AuNPs</b> |                                   |                 |           |            |
| 0.0100 mM            | 7.20                              | 0.59            | 0.60      | 3.46       |
| 0.0050 mM            | 7.38                              | 0.60            | 0.60      | 3.54       |
| 0.0025 mM            | 7.14                              | 0.58            | 0.61      | 3.42       |
| 0.0012 mM            | 7.06                              | 0.59            | 0.61      | 3.41       |

**Table S2** Power conversion efficiency (PCE), short-circuit current density ( $J_{sc}$ ), average electron lifetime ( $\tau_{avg}$ ), and maximum frequency ( $f_{max}$ ) of fabricated OSCs

| Devices       | PCE<br>(%) | $J_{sc}$<br>(mA/cm <sup>2</sup> ) | $\tau_{avg}$<br>( $\mu$ s) | $f_{max}$<br>(kHz) |
|---------------|------------|-----------------------------------|----------------------------|--------------------|
| Reference     | 3.24±0.03  | 6.85±0.08                         | 5.05                       | 31.62              |
| AuNPs         | 3.42±0.02  | 7.28±0.05                         | 5.05                       | 31.62              |
| B-AuQDs       | 3.32±0.02  | 7.05±0.15                         | 4.48                       | 35.48              |
| G-AuQDs       | 3.50±0.01  | 7.33±0.02                         | 4.00                       | 39.81              |
| R-AuQDs       | 3.45±0.04  | 7.21±0.07                         | 3.56                       | 44.67              |
| B-AuQDs/AuNPs | 3.44±0.04  | 7.20±0.11                         | 4.48                       | 35.48              |
| G-AuQDs/AuNPs | 3.66±0.03  | 7.61±0.04                         | 4.00                       | 39.81              |
| R-AuQDs/AuNPs | 3.54±0.01  | 7.38±0.05                         | 4.00                       | 39.81              |
